# Supplementary material for: Difficult Airway Society guidelines for awake tracheal intubation (ATI) in adults
Source: PubMed Central journal article supplement — Anaesthesia. 2019 Nov 14;75(4):509–28. doi: 10.1111/anae.14904 (PMC7078877; doi:10.1111/anae.14904), 2019-11-14
Supplement: ANAE-75-509-s002.pdf [file ANAE-75-509-s002.pdf]

1. Location .....

2. Appropriate staff present

Anaesthetic assistant

Second anaesthetist

*monitoring, sedation, anaesthesia*

Other .....

3. Team briefed

Procedure outline

Role allocation

Plan for failure

4. ATI device selected, prepared and checked

Tube (*type/size*).....

|                                                                                      |                                                |
|--------------------------------------------------------------------------------------|------------------------------------------------|
| Flexible bronchoscope <input type="checkbox"/>                                       | Videolaryngoscope <input type="checkbox"/>     |
| Route                                                                                | Device/blade                                   |
| Optional adjuncts                                                                    | Optional adjuncts                              |
| Oral airway <input type="checkbox"/> Suction <input type="checkbox"/>                | Stylet <input type="checkbox"/>                |
| SAD <input type="checkbox"/> Mucosal atomiser <input type="checkbox"/>               | Suction <input type="checkbox"/>               |
| Aintree catheter <input type="checkbox"/> Epidural catheter <input type="checkbox"/> | Bougie <input type="checkbox"/>                |
|                                                                                      | Mucosal atomiser <input type="checkbox"/>      |
| Device check                                                                         | Device check                                   |
| Focus <input type="checkbox"/> Tube correctly loaded <input type="checkbox"/>        | Lubricated <input type="checkbox"/>            |
| White balance <input type="checkbox"/> Image orientation <input type="checkbox"/>    | Anti-fog/wiped <input type="checkbox"/>        |
| Lubricated <input type="checkbox"/>                                                  | Tube correctly loaded <input type="checkbox"/> |
| Anti-fog/wiped <input type="checkbox"/> Battery/power <input type="checkbox"/>       | Battery/power <input type="checkbox"/>         |

5. Oxygenation .....

6. Sedation (*if required*) .....

7. Topicalisation

Nose ..... Oropharynx ..... Larynx ..... Trachea .....

Vasoconstrictor (*if required*) ..... Antisialagogue (*if used*) .....

|                               |                                    |
|-------------------------------|------------------------------------|
| <b>Maximum</b> lidocaine dose |                                    |
| _____ kg                      | x 9 mg.kg <sup>-1</sup> = _____ mg |
| _____                         |                                    |
| <b>Planned</b> lidocaine dose |                                    |
| _____ sprays of 10%           | _____ mg                           |
| _____ ml of 2%                | _____ mg                           |
| _____ ml of 4%                | _____ mg                           |

8. Setup position

Operator  Patient  Monitor  Suction

Pumps  Step  Airway Trolley  Bed
