# Supplementary material for: Difficult Airway Society guidelines for awake tracheal intubation (ATI) in adults
Source: PubMed Central journal article supplement — Anaesthesia. 2019 Nov 14;75(4):509–28. doi: 10.1111/anae.14904 (PMC7078877; doi:10.1111/anae.14904), 2019-11-14
Supplement: ANAE-75-509-s003.pdf [file ANAE-75-509-s003.pdf]

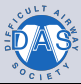

# Awake Tracheal Intubation Documentation

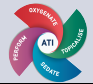

## Oxygenation

.....

## Sedation

Drug ..... Dose .....

Drug ..... Dose .....

## Topicalisation

Drug ..... Route .....

Drug ..... Route .....

Drug ..... Route .....

## Scope (FB/VL)

.....

## Tube

Oral / Nares L / R Size ..... Type .....

## Comments

.....

.....

.....
